## Accuracy of the pneumatic method for estimating xylem vulnerability to embolism in temperate diffuse-porous tree species

Sharath S. Paligi<sup>1,2,\*</sup>, Roman M. Link<sup>1,7,\*</sup>, Emilie Isasa<sup>1</sup>, Paulo Bittencourt<sup>3</sup>, Juliano Sarmiento Cabral<sup>4</sup>, Steven Jansen<sup>5</sup>, Rafael S. Oliveira<sup>6</sup>, Luciano Pereira<sup>5</sup>, Bernhard Schuldt<sup>1,7</sup>

<sup>1</sup> *University of Würzburg, Julius-von-Sachs-Institute of Biological Sciences, Chair of Ecophysiology and Vegetation Ecology, Julius-von-Sachs-Platz 3, 97082 Würzburg, Germany*

<sup>2</sup> *Present address: Plant Ecology and Ecosystems Research, Albrecht von Haller Institute for Plant Sciences, University of Göttingen, Göttingen, Germany*

<sup>3</sup> *College of Life and Environmental Sciences, University of Exeter, Exeter, United Kingdom*

<sup>4</sup> *Ecosystem Modeling Group, Center for Computational and Theoretical Biology, University of Würzburg, Würzburg, Germany*

<sup>5</sup> *Institute of Systematic Botany and Ecology, Albert-Einstein-Allee 11, Ulm University, D-89081 Ulm, Germany*

<sup>6</sup> *Department of Plant Biology, Instituto de Biologia, University of Campinas, Caixa Postal 6109, CEP 13083-970, Campinas, SP, Brazil*

<sup>7</sup> *Corresponding authors: roman.link@plant-ecology.de  
bernhard.schuldt@plant-ecology.de*

\* First and second author contributed equally to this work

*Running title: Accuracy of the pneumatic method*

|             |                        |       |
|-------------|------------------------|-------|
| Word count: | Summary                | 200   |
|             | Main body              | 6,316 |
|             | Introduction           | 1,040 |
|             | Materials and methods  | 2,232 |
|             | Results                | 695   |
|             | Discussion             | 2,363 |
|             | Acknowledgements       | 68    |
|             | Tables                 | 2     |
|             | Figures                | 5     |
|             | Supporting information | 6     |

**Keywords:** Cavitron, drought tolerance traits, xylem embolism resistance, vulnerability curve, methods comparison, Pneumatron, plant hydraulics.

## 1 **Summary**

- 2 • The increasing frequency of global change-type droughts has created a need for fast, accurate  
3 and widely applicable techniques for estimating xylem embolism resistance to improve  
4 forecasts of future forest changes.
- 5 • We used data from 12 diffuse-porous temperate tree species covering a wide range of xylem  
6 safety to compare the pneumatic and flow-centrifuge method for constructing xylem  
7 vulnerability curves. We evaluated the agreement between parameters estimated with both  
8 methods and the sensitivity of pneumatic measurements to the measurement duration.
- 9 • The agreement between xylem water potentials at 50% air discharged (PAD) estimated with  
10 the Pneumatron and 50% loss of hydraulic conductivity (PLC) estimated with the flow-  
11 centrifuge method was high (mean signed deviation: 0.12 MPa, Pearson correlation: 0.96  
12 after 15 sec of gas extraction). However, the relation between the estimated slopes was more  
13 variable, resulting in lower agreement in xylem water potential at 12% and 88% PAD/PLC.  
14 All parameters were sensitive to the duration of the pneumatic measurement, with highest  
15 overall agreement between methods after 16 sec.
- 16 • We conclude that, if applied correctly, the pneumatic method enables fast and inexpensive  
17 estimations of embolism resistance for a wide range of temperate, diffuse-porous species,  
18 which makes it attractive for predicting plant performance under climate change.

## 19 **Introduction**

20 In the last decades, unprecedented climate fluctuations and the resulting extreme drought events  
21 have led to large-scale tree dieback events worldwide (Allen *et al.*, 2010, 2015; Brando *et al.*,  
22 2019). With the global rise in frequency, intensity and duration of drought spells predicted by  
23 current climate projections (cf. Field *et al.*, 2012; Trenberth *et al.*, 2014), large-scale drought-  
24 induced tree mortality events become increasingly likely (Brodribb *et al.*, 2020).

25 To improve the prediction of demographic and compositional changes in forest ecosystems, a  
26 better understanding of physiological mechanisms associated with the death of trees in response  
27 to drought is necessary (Allen *et al.*, 2010; McDowell *et al.*, 2013a, 2013b). In this context,  
28 traits that quantify the vulnerability of a tree's xylem to drought-induced embolism have  
29 received particular attention (Choat *et al.*, 2018; Brodribb *et al.*, 2020). Vulnerability to  
30 embolism is usually expressed by the parameters of xylem vulnerability curves (VCs), i.e.  
31 curves describing the consecutive loss of hydraulic conductance (percent loss of conductivity,  
32 PLC) as a function of increasingly negative xylem pressures (cf. Sperry *et al.*, 1988; Cochard  
33 *et al.*, 2013). Most commonly, VCs are described by the water potential at 12, 50 or 88% loss  
34 of hydraulic conductance ( $P_{12}$ ,  $P_{50}$  and  $P_{88}$ , respectively) and the slope of the curve at one of  
35 the respective locations. The parameters of VCs have been linked to mechanistic thresholds for  
36 xylem functioning (cf. Brodribb & Cochard, 2009; Urli *et al.*, 2013; Delzon & Cochard, 2014),  
37 and are closely coordinated with stomatal regulation (Martin-StPaul *et al.*, 2017). Across  
38 biomes, xylem embolism resistance has been associated with the susceptibility of a species to  
39 drought-induced mortality (Anderegg *et al.*, 2016; Adams *et al.*, 2017; Correia *et al.*, 2019;  
40 Powers *et al.*, 2020) and thus mirrors the distribution of species along aridity gradients  
41 (Blackman *et al.*, 2014; Trueba *et al.*, 2017; Oliveira *et al.*, 2019). Due to their immediate  
42 mechanistic interpretation, VC parameters and derived quantities such as hydraulic safety  
43 margins (Meinzer *et al.*, 2009) are increasingly incorporated in process-based vegetation  
44 models to describe plant drought responses and associated drought-induced tree mortality

45 (McDowell *et al.*, 2013a, 2013b; Christoffersen *et al.*, 2016; Xu *et al.*, 2016; Davi & Cailleret  
46 2017; Eller *et al.*, 2020).

47 Xylem VCs can be established through a large number of different techniques, such as the bench  
48 dehydration (Sperry *et al.*, 1988), air injection (Cochard *et al.*, 1992), flow-centrifuge (Cochard  
49 *et al.*, 2005), micro-CT (Brodersen *et al.*, 2010), pneumatic (Pereira *et al.*, 2016), optical  
50 (Brodrigg *et al.*, 2016) and relative water loss method (Rosner *et al.*, 2019). However, none of  
51 these methods is unequivocally reliable for angiosperm and gymnosperm species, either due to  
52 measurement artefacts associated with vessel length and porosity (Cochard *et al.*, 2013; Jansen  
53 *et al.*, 2015) or because they are not suitable for rapid measurements of large number of samples  
54 (Cochard *et al.*, 2013; Nolf *et al.*, 2017). Given their usefulness to predictive models, methods  
55 for the measurement of xylem embolism that are simple, accessible, reliable and applicable for  
56 a wide range of taxonomic groups and xylem types are needed.

57 A novel, promising route for fast indirect VC measurements is the pneumatic method (Pereira  
58 *et al.*, 2016; Jansen *et al.*, 2020), which estimates the amount of xylem embolism by measuring  
59 the increase of air volume in the xylem in bench-dried plant samples with increasingly negative  
60 xylem pressure. Recently, Pereira *et al.* (2020) proposed an automated device, the Pneumatron,  
61 which automatically measures air discharge from a plant sample at a high temporal resolution  
62 and permits a high sample throughput. As the measurement principle of the Pneumatron does  
63 not directly depend on the measurement of xylem water transport, and embolism is induced by  
64 bench dehydration, it is assumed to be relatively robust against measurement artefacts related  
65 to sample excision and preparation as well as vessel length related artefacts (Pereira *et al.*, 2016,  
66 2020), which are known to affect several hydraulic VC methods (cf. Choat *et al.*, 2010; Wheeler  
67 *et al.*, 2013; Martin-StPaul *et al.*, 2014; Torres-Ruiz *et al.*, 2014, 2015).

68 The pneumatic method has already been applied to construct VCs for branches, leaves and roots  
69 of tropical, subtropical and temperate species, covering diffuse-porous, ring-porous and  
70 coniferous species (Pereira *et al.*, 2016, 2020; Zhang *et al.*, 2018; Wu *et al.*, 2020; Sargent *et*

71 *al.*, 2020). The results from these studies indicate the suitability of the method for diffuse-  
72 porous (Pereira *et al.*, 2016; Zhang *et al.*, 2018; Sergent *et al.*, 2020) and for ring-porous species  
73 (though the latter only after gluing growth rings other than the current year rings; cf. Zhang *et*  
74 *al.*, 2018). However, Zhang *et al.* (2018) reported that the pneumatic method resulted in lower  
75 estimates of embolism resistance of two conifer species compared to the flow-centrifuge  
76 method. Similarly, in a recent methodological comparison of VC techniques, Sergent *et al.*  
77 (2020) found the pneumatic method to result in lower embolism resistance estimates compared  
78 to other methods in further two conifer species, and reported inconsistent estimates for long-  
79 vesseled species. Several sources of uncertainty have been identified for the pneumatic method  
80 that leave room for potential methodological improvements. Notably, its estimates are known  
81 to be sensitive to the choice of the reservoir volume and the duration of the air discharge  
82 measurement (Pereira *et al.*, 2016, 2020). Prior studies have used vastly different time intervals  
83 to measure air discharge (AD) from the xylem segment, ranging from 150 sec (Pereira *et al.*,  
84 2016; Chen *et al.*, 2021), over 120 sec (Zhang *et al.*, 2018; Sergent *et al.*, 2020; Wu *et al.*,  
85 2020), to only 30 sec (Pereira *et al.*, 2020). Since a 15 sec duration was predicted as optimal  
86 discharge time based on the Unit Pipe Pneumatic model (Yang *et al.*, 2021), there is a need to  
87 test this hypothesis experimentally. Moreover, despite considerable attention to measuring  
88 artefacts and methodological concerns, we currently lack a rigorous statistical framework to  
89 compare embolism resistance methods.

90 This study uses a dataset of vulnerability curve measurements from 36 trees belonging to 12  
91 temperate, diffuse-porous tree species to i) assess how well the parameters of the vulnerability  
92 curves obtained with the pneumatic method (Pneumatron) agree with estimates obtained from  
93 the flow-centrifuge method (Cavitron) in terms of systematic deviations, random deviations and  
94 overall agreement, and to ii) identify the optimal duration for air discharge measurements.

95

96 **Materials and Methods**

97 *Plant material*

98 Plant material from trees belonging to 12 temperate diffuse-porous tree species (Table 1) was  
99 collected between mid-July and mid-September 2019 from a nursery in Veitshöchheim  
100 (49°50'24.3"N, 9°52'38.4"E) near Würzburg, Germany. These trees were planted in the year  
101 2011 in the framework of a long-term comparative experiment designed to identify appropriate  
102 tree species for urban planting. The plant material cultivated in Veitshöchheim was obtained  
103 from selected nurseries across Central Europe. Due to anomalies in the data for some of the  
104 species (see below), additional branch samples were obtained from adult *Tilia cordata* and *Tilia*  
105 *platyphyllos* trees growing at Ulm University, Germany (48°25'20.3"N, 9°57'20.2"E) and of  
106 *Tilia japonica* from the Würzburg botanical garden (49°45'56.7"N 9°55'58.1"E) in September  
107 2020.

108 The samples were collected before 9:30 a.m. to assure sample excision took place in a relaxed  
109 state, thus avoiding measurement artefacts associated with cutting under tension (Wheeler *et*  
110 *al.*, 2013). From each of the experimental trees, one sun-exposed branch 70 - 120 cm in length  
111 or any kind of damage to avoid leaks and consequent embolism overestimation. All suspicious  
112 leakage points were sealed using a fast-drying contact adhesive (Loctite 431 with Loctite  
113 activator SF 7452, Henkel, Düsseldorf, Germany). Fruits present on the branches were removed  
114 and sealed with the same glue, as they easily detach with progressing dehydration and are hence  
115 a potential site of air-entry. Similarly, in the case of *Crataegus persimilis*, thorns were removed  
116 and sealed in the same manner to ease the handling of the branches.

117

118 *Measurements of vulnerability curves with the pneumatic method*

119 Branch xylem vulnerability curves based on the pneumatic method (Pereira *et al.*, 2016) were  
120 obtained for 44 samples from 35 experimental trees (Table 1) using the Pneumatron, a device

121 that combines a microcontroller-activated vacuum pump and a pressure transducer to allow for  
122 automated measurements of air discharge (Pereira *et al.*, 2020; Jansen *et al.*, 2020).

123 The reservoir pressure was tracked with the Pneumatron in 0.5 sec intervals over a span of two  
124 minutes per measurement (including a pump time of approximately 2 sec in semi-automated  
125 mode and few milliseconds in automated mode). The amount of air discharged (AD) into the  
126 reservoir was calculated based on the ideal gas law (Pereira *et al.*, 2016). The semi-automated  
127 mode of the Pneumatron was used to measure AD for the samples obtained from Veitshöchheim  
128 and Würzburg, whereas the additional branch samples of *T. cordata* and *T. platyphyllos*  
129 processed in Ulm were measured in automated mode. After each AD measurement, the xylem  
130 water potential was measured (see below). The maximum detectable amount of AD is  
131 associated with a change of pressure in the system by ~50 kPa (Pereira *et al.*, 2020). As the  
132 time necessary for a pressure change of 50 kPa depends on the ratio between the reservoir  
133 volume (including the cut-open conduit volume) and the volume of gas extracted from intact,  
134 embolised conduits, the choice of the optimal reservoir volume is crucial (cf. Pereira *et al.*,  
135 2020). For this study, reservoir volumes of 1.7 – 3.3 ml were selected based on the available  
136 information about the species' embolism resistance from the xylem functional traits database  
137 (Choat *et al.*, 2012), assuming that higher embolism resistance corresponds to a lower volume  
138 of gas extracted from intact, embolised conduits and hence a lower optimal reservoir volume  
139 and vice-versa. Meanwhile, however, Pereira *et al.* (2020), recommend determining the  
140 maximum reservoir volume from a completely dried branch per species. Throughout the  
141 measurements, the volume of the vacuum reservoir was kept constant for each branch.

142 Once the branch was fully hydrated, a clean cut was made in air at the basipetal end using a  
143 sharp razor blade to clear obstructions for air flow (Pereira *et al.*, 2016; Jansen *et al.*, 2020).

144 Although this seems counterintuitive at first glance, cutting in air was done intentionally  
145 because the cut-open conduits need to be embolised when starting pneumatic measurements.

146 The branch was then connected to the pneumatic apparatus using rigid and elastic tubing, plastic

147 clamps and three-way stopcocks (Fig. S1, S2). The volume of the elastic tube was kept as small  
148 as possible to minimize pressure-dependent changes in reservoir volume. The elastic tubing  
149 was tightened with a plastic clamp to ensure no leakage occurred during the measurement  
150 (Bittencourt *et al.*, 2018). Before each series of measurements and in case of suspicious  
151 increases in the amount of AD, the connections and the plant material were thoroughly  
152 inspected to identify and seal potential air-entry points.

153 Before AD measurements were taken, the branch samples were bagged in dark plastic bags to  
154 equilibrate water potential. During AD measurement, the branches were kept bagged to  
155 minimize transpiration. Between measurements, the branches were dehydrated at room  
156 temperature on a laboratory bench to induce embolism (Sperry *et al.*, 1988). The branches were  
157 initially dried for intervals of about 15 – 30 min, which were subsequently increased to 1 – 4 h  
158 depending on how quickly the sample dried. To allow xylem water potential to equilibrate after  
159 each drying interval, the samples were bagged for about 30 min in the initial steps of  
160 dehydration, and for at least one hour in the later stages to account for the decrease in the leaf-  
161 stem conductance (cf. Pereira *et al.*, 2016). AD measurements were made on multiple branches  
162 on the same day (see Fig. S1 – S3). The elastic tubing was always kept connected to the branch  
163 samples when switching branches to keep the reservoir volume constant throughout all  
164 measurements. AD measurements were taken until the branches were completely dehydrated  
165 and no considerable variation was observed in the amount of AD in consecutive measurements  
166 over at least 24 h, or until the maximum absolute xylem water potential measurable with the  
167 Scholander pressure chamber (10 MPa) was reached. This resulted in measurement durations  
168 of 3 – 7 days as well as in 10 – 20 AD and leaf water potential measurements per branch when  
169 following the semi-automated mode of the Pneumatron. The percentage of air discharged  
170 (PAD) was calculated as described by Pereira *et al.* (2016):

$$171 \quad PAD_i = 100 * (AD_i - AD_{min}) / (AD_{max} - AD_{min}), \quad (1)$$



172 where  $AD_i$  is the amount of air discharged for measurement  $i$ ,  $AD_{min}$  is the minimum amount  
173 of air discharged from the fully hydrated branch, and  $AD_{max}$  is the maximum amount of air  
174 discharged from the branch when completely desiccated.

175

#### 176 *Xylem water potential measurement*

177 For the 35 branch samples measured in semi-automated mode, the xylem pressure was  
178 measured with a Scholander pressure chamber (PMS Instruments, Corvallis, Oregon, USA)  
179 after every AD measurement. At each pressure step, two leaves were cut-off from the branch,  
180 and xylem water potential was averaged over two pressure chamber measurements. When the  
181 petiole was too small for measurement in the pressure chamber, small terminal twigs were used.  
182 The cut was immediately sealed using an instant adhesive (Loctite 431) to prevent leakage  
183 during the subsequent AD measurements. For the nine branches of *T. cordata* and *T.*  
184 *platyphyllos* measured using the automated mode of a Pneumatron, a stem psychrometer (ICT  
185 International, Armidale NSW Australia) was installed at a distal part of the branch to record  
186 xylem pressures for every 15 min. To obtain pressure estimates for each point in time and to  
187 reduce the impact of measurement uncertainty in the psychrometric water potentials, the  
188 psychrometer measurements for each sample were smoothed with shape-constrained additive  
189 models using monotone decreasing P-splines based on R package `scam` v. 1.2-8 (Pya, 2020).

190

#### 191 *Measurements of vulnerability curves with the flow-centrifuge method*

192 The flow-centrifuge technique (Cavitron; Cochard *et al.*, 2005) was used as a reference method  
193 for comparing the agreement of xylem vulnerability curves based on hydraulic measurement  
194 methods with curves based on the Pneumatron. Flow-centrifuge measurements were performed  
195 for 49 samples from 36 trees with a Cavitron device built from a Sorval RC 5 series centrifuge  
196 with manual control of rotation speed, and using the `Cavisoft` software (`Cavisoft` version  
197 5.2.1, University of Bordeaux, Bordeaux, France). Samples were recut several times under

198 water to a final length of 27.5 cm to release the tension in the xylem (Torres-Ruiz *et al.*, 2015).  
199 Subsequently, the non-flushed branch segments were inserted in a custom-made rotor after  
200 removing the bark at both ends. They were then spun using the principle of centrifugal force to  
201 generate a negative pressure in the xylem segment while simultaneously measuring hydraulic  
202 conductance. Flow centrifuge measurements were performed with filtered (0.2  $\mu\text{m}$ ) and  
203 degassed demineralized water that was enriched with 10 mM KCl and 1 mM  $\text{CaCl}_2$ .  
204 Measurements began at xylem water potentials of around -0.8 MPa and were continued under  
205 increasingly negative xylem pressures until the percentage loss of hydraulic conductivity (PLC)  
206 reached at least 90%.

207

### 208 *Statistical analysis*

209 All data handling and statistical analyses were performed in R version 4.0.2 (R Core Team,  
210 2020) in the framework of the `tidyverse` (Wickham *et al.*, 2019). Both the vulnerability  
211 curves based on pneumatic and flow-centrifuge measurements were described with tree-level  
212 nonlinear regression models using the logistic function by Pammenter & Van der Willigen  
213 (1998). For the flow-centrifuge method, vulnerability curves were based on the raw  
214 conductivity measured by the Cavitron (cf. Ogle *et al.*, 2009):

$$215 \quad K_i = \text{Normal} \left( k_{\text{sat}} \left( 1 - \frac{1}{1 + \exp\left(\frac{S_{50H}}{25} (P_i - P_{50H})\right)} \right), \sigma \right), \quad (2)$$

216 where  $K_i$  and  $P_i$  are the measured hydraulic conductivity and xylem pressure for observation  $i$ ,  
217 respectively,  $k_{\text{sat}}$  is the hydraulic conductivity under fully saturated conditions, and  $S_{50H}$  is the  
218 slope at 50% loss of conductivity ( $P_{50H}$ ). For the pneumatic measurements, analogous models  
219 were constructed based on PAD for estimating  $P_{50P}$  (Eq. 1):

$$220 \quad \text{PAD}_i = \text{Normal} \left( \frac{100}{1 + \exp\left(\frac{S_{50P}}{25} (P_i - P_{50P})\right)}, \sigma \right), \quad (3)$$

221 To evaluate the effect of the air-discharge time on the accuracy of the estimates of vulnerability  
222 curve parameters, separate pneumatic vulnerability curves were fit on PAD calculated for all  
223 measurement durations between the initial pressure immediately after pumping and variable  
224 final pressures in 0.5 sec intervals, from 4.5 to 115 sec. The  $P_{12}$  and  $P_{88}$  (xylem pressure at 12%  
225 and 88% loss of conductivity, respectively) were calculated from the estimated model  
226 parameters ( $P_{50}$  and the corresponding slope at this pressure) by rearranging the model equation  
227 (Eqs. 2 & 3), and with confidence intervals based on parametric bootstrap ( $n = 10,000$ ). The  
228 uncertainty in VC parameters was taken into account for the calculation of species averages of  
229 VC parameters and their standard errors by using inverse-variance weighting analogous to a  
230 fixed-effects meta-analytical model (cf. Rosenberg *et al.*, 2013).

231 We subsequently calculated a set of statistics that describe the degree of agreement of the  
232 Pneumatron parameter estimates with the flow-centrifuge based values in terms of systematic  
233 deviations, random deviations, and overall agreement. For the Pneumatron measurements from  
234 *Tilia japonica*, *T. cordata* and *T. platyphyllos*, these calculations were based on tree averages  
235 of the flow-centrifuge parameters when replicate measurements were performed per tree (Tab.  
236 1).

237 Systematic deviations between Pneumatron and flow-centrifuge based VC parameter estimates  
238 were quantified by the mean signed deviation (MSD). The MSD only measures additive bias  
239 between the parameter estimates obtained by the pneumatic and flow-centrifuge methods ( $\theta_P$   
240 and  $\theta_H$ , respectively) and does not penalize scatter in the relationship.

$$241 \quad \text{MSD} = \frac{1}{n} \sum (\theta_P - \theta_H) \quad (5)$$

242 Random deviations between the estimates of both methods was evaluated by the Pearson  
243 correlation  $\rho$  between  $\theta_P$  and  $\theta_H$ . The correlation coefficient only penalizes the degree of scatter  
244 around a hypothetical line through  $\theta_P$  and  $\theta_H$  and does not include information about systematic  
245 differences.

246 
$$\rho = \frac{\text{cov}(\theta_P, \theta_H)}{\text{SD}(\theta_P) \text{SD}(\theta_H)} \quad (4)$$

247 The overall agreement of the parameter estimates was evaluated by the root mean square  
248 deviation (RMSD). Unlike the aforementioned metrics, the RMSD penalizes both systematic  
249 and random deviations between  $\theta_P$  and  $\theta_H$ .

250 
$$\text{RMSD} = \sqrt{\frac{1}{n} \sum (\theta_P - \theta_H)^2} \quad (6)$$

251 In addition, as a pragmatic measure to quantify the overall match of the flow-centrifuge and  
252 pneumatic vulnerability curves over their entire range, we calculated the  $L_2$  distance (cf.  
253 Cramér, 1928) between each pair of flow-centrifuge and pneumatic vulnerability curves:

254 
$$L_2 = \left( \int_{-\infty}^{\infty} (PLC_H(P) - PLC_P(P))^2 dP \right)^{1/2} \quad (7)$$

255 This quantity describes the degree of similarity of the two vulnerability curves and approaches  
256 zero for identical curves.

257 In addition to the comparison of metrics describing the agreement between estimates, we used  
258 linear mixed effects models based on R package `lme4` version 1.1-23 (Bates *et al.*, 2015) to  
259 test for statistically significant differences between the Cavitron-based estimates of  $P_{12}$ ,  $P_{50}$ ,  $P_{88}$   
260 and (natural log-transformed)  $S_{50}$  and their Pneumatron-based equivalents for AD intervals of  
261 15, 30, 60, 90 and 115 sec from the initial pressure at 4 sec. Each model was fit to each  
262 parameter using restricted maximum likelihood with “method” as a fixed effect and random  
263 intercepts for species and individual trees nested in species. The flow-centrifuge was considered  
264 as baseline and contrasted with each one term for the Pneumatron estimates in five different  
265 intervals. Model assumptions were checked by residual diagnostic plots. Inference was based  
266 on Wald  $t$ -tests with Satterthwaite’s approximation to the degrees of freedom using R package  
267 `lmerTest` version 3.1-2 (Kuznetsova *et al.*, 2017).

268

## 269 **Results**

### 270 *Estimated vulnerability curves*

271 The average  $P_{50H}$  estimates obtained from the flow-centrifuge method covered a wide range of  
272 embolism resistance from -1.85 MPa to -6.02 MPa for *Platanus* × *acerifolia* and *Crataegus*  
273 *persimilis*, respectively. Parameters estimated with the pneumatic method largely fell into the  
274 same range (cf. Table S1). In general, there was a good agreement in overall shape between the  
275 flow-centrifuge and pneumatic vulnerability curves (VCs) for most of the species studied.  
276 However, the estimates in  $P_{12P}$ ,  $P_{50P}$  and  $P_{88P}$  for *T. cordata* and *T. platyphyllos* based on the  
277 pneumatic method were on average at least 0.5 MPa higher than the corresponding estimates  
278 of the flow-centrifuge method when their xylem pressure was measured using a pressure  
279 chamber (Table S1). Additional measurements performed to explain this discrepancy showed  
280 that embolism resistance was largely within a comparable range when xylem pressure was  
281 determined by stem psychrometers (with the exception of  $P_{88P}$  for *T. cordata*; Table S1; Fig.  
282 S4). As there were reasons to assume that the differences observed were caused by inaccurate  
283 xylem water potential measurements with the pressure chamber, results for the best AD  
284 measurement intervals are based only on the observations with xylem pressure measurements  
285 based on stem psychrometers.

286

### 287 *Overall agreement between methods*

288 The parameters of the vulnerability curves estimated with the two methods were generally  
289 highly correlated, with Pearson correlations above 0.54 for all parameters and over 0.74 for  $P_{12}$ ,  
290  $P_{50}$  and  $P_{88}$  for all AD times considered in Table S2 and all 12 tree species (Table S2). In  
291 particular, this was true for the  $P_{50}$  estimates, where correlations exceeded 0.95 in all cases.  
292 Moreover, the  $P_{50}$  estimates of the two methods were very close to the 1:1 line (cf. Fig. 2b,  
293 Table S2). The Pneumatron-based estimates of the slope of the vulnerability curve, however,  
294 on average showed a negative systematic deviation that ranged from -25.5% (retransformed

295 from log scale, 15 sec AD time) to  $-28.1\%$  (115 sec AD time; cf. Fig. 1, 2d; Table S2). The  
296 deviation was notably larger in samples with lower slopes, and was not observed for the samples  
297 measured with stem psychrometers (Fig. 2). Due to the direct relationship between slope and  
298  $P_{50}$ , the systematically lower slope estimates translated to a higher  $P_{12P}$  (by up to 0.77 MPa on  
299 average at 115 sec AD time) and, in some cases, a lower  $P_{88P}$  (by up to  $-0.26$  MPa on average  
300 at 15 sec AD time; Fig. 2, Table S2).

301

### 302 *Influence of discharge time*

303 The pneumatic estimates of all VC parameters were sensitive to the chosen discharge time  
304 (Table 2, S2, Fig. 3, 4, 5). However, the change in agreement with air discharge time was neither  
305 consistent between parameters nor between species (Table S2, Fig. 4, 5). Consequently, the  
306 discharge interval associated with the lowest deviation between flow-centrifuge and pneumatic  
307 estimates of  $P_{50}$  (Fig. 3) and other parameters differed largely between species, with an  
308 increasing deviation with discharge time for some species (*Betula*, *Carpinus*, *Crataegus* and  
309 *Tilia*) and a decreasing deviation for others (*Ostrya*, *Platanus*, *Pyrus* and *Sorbus*). After  
310 accounting for random variation between species and trees, significant systematic differences  
311 between the reference value based on the flow-centrifuge method and the pneumatic method at  
312 all analysed AD times remained for all parameters, with the exception of  $P_{88}$  (Table 2).

313 The response of the pneumatic estimates of the vulnerability curve parameters to AD time was  
314 not consistent between parameters (Fig. 4). Depending on the parameter, the overall agreement  
315 with the flow-centrifuge method was either highest at low AD times ( $P_{12}$ ), remained relatively  
316 stable over a wide range of AD times ( $P_{50}$ ,  $S_{50}$ ) or increased continuously with increasing AD  
317 time ( $P_{88}$ ; cf. Fig. 4). In any case, the  $L_2$  distance (which describes the overall match of the  
318 curves over their entire range instead of focusing on a point estimate) was lowest at relatively  
319 low AD times with a minimum at 16 sec and a relatively broad range of equivalent values from  
320 10.5 to 44.5 sec (Fig. 5). This indicates that the lowest degree of dissimilarity between the

321 curves corresponded to AD times in this range, which moreover was associated with the lowest  
322 systematic differences in  $P_{50}$  estimates (Table 2, S2; Fig. 4).

323

## 324 **Discussion**

325 In agreement with previous assessments of the pneumatic method for vulnerability curve (VC)  
326 measurements (Pereira *et al.*, 2016, 2020; Zhang *et al.*, 2018; Sergent *et al.*, 2020), we find that  
327 the estimated water potential at 50% of discharged air volume ( $P_{50P}$ ) coincide well with the  
328 water potential at 50% loss of conductance ( $P_{50H}$ ) measured with the flow-centrifuge method  
329 for the 12 diffuse-porous temperate tree species studied, with low systematic and random  
330 deviations and a high overall agreement (MSD = +0.117 MPa,  $\rho = 0.956$ , RMSD =  $\pm 0.538$   
331 MPa, respectively for 15 sec AD time, Table S2). However, we find evidence for a high  
332 variance and systematic differences in the estimates of the slope of the VC (Fig. 1), that were  
333 on average at least 25.5% (15 sec air discharge time, cf. Table S2) lower for the pneumatic  
334 method, which also resulted in a lower agreement in the estimates of  $P_{12P}$  and  $P_{88P}$ . Similar  
335 conclusions were found based on a pneumatic modelling approach (Yang *et al.*, 2021), and  
336 based on experimental evidence by comparing the pneumatic and the optical method (Pereira  
337 *et al.*, 2020; Guan *et al.*, 2021). A mechanistic explanation for the difference in  $P_{12}$  and  $P_{88}$   
338 values is provided by the open-xylem artefact, which suggests that embolism spreading could  
339 be enhanced by the proximity to gas under atmospheric pressure in the open-cut conduits (Guan  
340 *et al.*, 2021).

341 Moreover, our results demonstrate that the estimates obtained with the pneumatic method are  
342 sensitive to the choice of air discharge time (cf. Pereira *et al.*, 2016, 2020), to which they  
343 respond in a nonlinear and species-specific manner. For the analyzed set of species, the best  
344 overall match between the flow-centrifuge and pneumatic VCs could be achieved for air  
345 discharge times of around 15 sec (cf. Fig. 4), which experimentally confirms the ideal AD time  
346 identified by a modelling approach (Yang *et al.*, 2021).

347

348 *Agreement between flow-centrifuge and pneumatic vulnerability curves*

349 The gradual loss of conductance and the increasing amount of gas extracted, which are  
350 quantified by the PLC and PAD, are necessarily positively associated as they share a common  
351 cause, namely embolism spreading under progressing dehydration. However, PAD quantifies  
352 the air volume inside embolised vessels, while PLC measures their contribution to the  
353 conductance of the branch. Thus, both arise from vessel properties that scale with different  
354 powers of their length and diameter (Pereira *et al.*, 2016). While the volume of a vessel scales  
355 with the second power of diameter and is proportional to its length, its flow resistance (i.e. the  
356 inverse of its conductance) can be approximated by the sum of the resistance posed by its lumen  
357 and the resistance posed by the transition through pit membranes (Sperry *et al.*, 2005; Wheeler  
358 *et al.*, 2005). According to the Hagen-Poiseuille-equation, the flow resistance of the lumen  
359 scales with the inverse of the fourth power of its diameter and is proportional to its length. The  
360 flow resistance posed by the transition through pit membranes can be assumed to scale with the  
361 inverse of expected vessel length (Sperry *et al.*, 2005). Due to these different scaling  
362 relationships, the association between PAD and PLC does not necessarily have to be linear.  
363 Observed systematic differences between the parameters of curves obtained with different  
364 methods (cf. Table 2) might therefore not be surprising and deserve further testing.

365 It should also be noted that an additional downward bias in the slope might be introduced by  
366 treating the unknown true minimum and maximum amount of air discharged ( $AD_{\min}$  and  $AD_{\max}$ ,  
367 cf. Eq. 1) as fixed quantities measured without error. For hydraulic vulnerability curves,  
368 problems induced by treating maximum conductivity as fixed can be circumvented by treating  
369 the saturated hydraulic conductivity as a model parameter ( $k_{\text{sat}}$  in Eq. 2; Ogle *et al.*, 2009;  
370 Duursma & Choat, 2017). Implementing a similar solution for the pneumatic method is not  
371 straightforward due to the common identifiability issues in sigmoidal models where the lower  
372 and upper bound are both treated as model parameters.



373 Given the direct mathematical relation between the model parameters, a bias in slope can be  
374 expected to result in a bias in  $P_{12}$  and/or  $P_{88}$ , which may be problematic in process-based  
375 vegetation modelling that use these VC parameters to describe drought resistance. Our results  
376 indicate that while the pneumatic method produces reliable estimates of the  $P_{50}$  for diffuse-  
377 porous tree species, the curves obtained might not always be interchangeable with curves  
378 constructed with the flow-centrifuge method.

379

### 380 *Effect of the air discharge interval on measurement accuracy*

381 The observed sensitivity of the pneumatic method to the AD interval provides experimental  
382 evidence that is in line with predictions by the Unit Pipe Pneumatic model (Yang *et al.*, 2021).  
383 To understand the relationship between the AD interval and the amount of air discharged in that  
384 interval, it is necessary to focus on the underlying assumptions about the gas flow between  
385 sample and reservoir. One central assumption of the pneumatic method is that the amount of  
386 air discharged into the vacuum reservoir over a given time span is a function of the amount of  
387 air  $N$  inside embolised conduits at different points during the dehydration process (Jansen *et al.*,  
388 2020; Yang *et al.*, 2021). This assumption is necessary to be able to use PAD measurements to  
389 infer the degree of embolization. Further, if the PAD calculated over different AD times  $t$  is to  
390 result in identical vulnerability curves, the change in AD with time must have the same shape  
391 at different dehydration steps and only differ by a multiplicative constant proportional to the  
392 amount of air  $N$  in the xylem, i.e.  $AD(t, N_1) / N_1 = AD(t, N_2) / N_2$  must hold. This assumption is  
393 likely only approximately met under typical measurement conditions. During the drying  
394 process, the xylem undergoes substantial changes that may affect the shape of  $AD(t, N)$ , such  
395 as an increase in gas conductivity with progressing embolism. Moreover, it is possible that  
396 embolised conduits that were not disconnected from to the cut surface at earlier drying steps  
397 subsequently become connected to the network of open vessels connecting to the vacuum  
398 reservoir (Pereira *et al.* 2016). In such cases, the amount of air in these spaces would not be

399 included in the earlier estimates. For these reasons, the relationship between the AD measured  
400 in different desiccation steps after a certain discharge interval and the total amount of air within  
401 the xylem at those points in time is likely empirical. This may explain the pronounced species  
402 differences in the response to AD time (Table S2, 4, Fig. 3), and contribute to the previously  
403 reported differences in accuracy for species with different types of wood anatomy (e.g. Zhang  
404 *et al.*, 2018).

405 While the effect of AD time depended on species identity, and was different for different  
406 parameters, Fig. 4 indicates that overall mismatch between flow-centrifuge and pneumatic VCs  
407 could be minimized by choosing low AD times of ca.16 sec. In our setting, this might be a  
408 consequence of small amounts of air-entry into the xylem where the branch is damaged, which  
409 – unlike the other discussed factors influencing AD – will have an effect that accumulates with  
410 discharge time. Thus, the net gains in accuracy due to integrating over a larger time interval are  
411 overcompensated by the increasing contribution of potential leakage to the total AD.  
412 Interestingly, the higher agreement with hydraulic reference values at lower AD times contrasts  
413 with the higher accuracy for longer AD times reported in earlier works using the manual  
414 pneumatic method (cf. Fig. S3 in Pereira *et al.* 2016). Most likely, this difference results from  
415 the higher temporal resolution and more accurate AD time measurement enabled by the  
416 automated Pneumatron device (Pereira *et al.* 2020). When using a Pneumatron, the choice of  
417 short AD times therefore is a pragmatic way to improve the accuracy of the pneumatic method.

418

#### 419 *Species-specific drying behaviour*

420 As noted previously (Zhang *et al.*, 2018; Sergent *et al.*, 2020), the degree of similarity between  
421 VCs measured with the pneumatic method and hydraulic reference methods differs between  
422 species. In this study, we observed a mismatch for *T. cordata* and *T. platyphyllos* when xylem  
423 pressure was expressed based on leaf water potentials measured with a pressure chamber.

424 However, the difference largely disappeared when a stem psychrometer was used to determine  
425 xylem pressure (Fig. 1, S4).

426 Possible explanations for the observed differences is the presence of abundant mucilage in the  
427 xylem tissues of *Tilia* species (Franz & Kram, 1985; Pigott *et al.*, 2012), which has been  
428 reported to affect xylem pressures measured with the pressure chamber technique  
429 (Zimmermann *et al.*, 2002). Furthermore, it could be speculated that the truncated shape of the  
430 pressure-chamber based Pneumatron VCs for the *Tilia* species (especially *T. cordata*, cf. Fig.  
431 S4), and the fact they never reached water potentials substantially more negative than -3 MPa,  
432 indicates that the measurements were terminated before the stems of the specimens were fully  
433 dehydrated. This results in underestimated values for  $AD_{max}$ , thus shifting the curve towards  
434 less negative water potentials. As detailed before, the desiccation was continued until a near  
435 constancy in the measured  $AD$  values over at least 24 h was reached. This criterion to finish  $AD$   
436 measurements may not be ideal, as the drying process may slow down notably after full stomatal  
437 closure, which especially for isohydric species may happen in a relatively well-hydrated state.  
438 Notably, while *Tilia* species have often been considered to be relatively anisohydric (cf.  
439 Leuzinger *et al.*, 2005; Galiano *et al.*, 2017; Kiorapostolou *et al.*, 2018; but see Niinemets *et*  
440 *al.*, 1999), recent work by Leuschner *et al.* (2019) indicates that at least *T. cordata* has a fairly  
441 stringent, more isohydric stomatal control mechanism. Due to the anticipated hydraulic  
442 segmentation between leaf petioles and stem xylem in drought-avoiding and more isohydric  
443 species (Hartmann *et al.*, 2021), this may have contributed to the mismatch between flow-  
444 centrifuge and pneumatic VCs. It is well documented that certain species rely on early drought-  
445 induced leaf shedding (Wolfe *et al.*, 2016; Hochberg *et al.*, 2017), most likely caused by a  
446 pronounced hydraulic segmentation (cf. Pivovarov *et al.*, 2016; Zhu *et al.*, 2016; Klepsch *et*  
447 *al.*, 2018). As these processes decouple leaf and branch water potentials, measuring leaf water  
448 potential with a Scholander pressure chamber may result in extreme water potential readings  
449 that do not reflect the actual status in the xylem. Conversely, the slowdown of dehydration

450 induced by leaf shedding may result in prematurely terminated measurements when measuring  
451 branch water potentials with e.g. a stem psychrometer, or when determining the end of the  
452 dehydration process based on the state of the leaves. As a cautionary example, the leaves of  
453 *C. persimilis* were almost fully dehydrated on the third day of measurements, while the branch  
454 water potential values continued to decline for seven days. Similar behaviour was reported by  
455 Wolfe *et al.* (2016) for the tropical species *Genipa americana*.

456 Due to these species-specific differences in drying behaviour, the stability of  $AD_{\max}$  can have a  
457 strong influence on the shape of the vulnerability curves because all pneumatic  $PAD$  values are  
458 normalized against  $AD_{\min}$  and  $AD_{\max}$ . It may therefore be advantageous to continue the drying  
459 process until the constancy of  $AD_{\max}$  has been confirmed based on several measurements to  
460 avoid bias resulting from underestimating  $AD_{\max}$ . An important corollary of the observed  
461 problems associated with water potential measurements is that the same kind of bias in water  
462 potential may also affect hydraulic VC measurements in other methods that rely on bench  
463 dehydration.

464

#### 465 *Implications for future vulnerability curve method comparisons*

466 An important limitation that affects all evaluation studies of VC methods – as well as most  
467 other measurement methods in biology – is the lack of true reference values for VC parameters.  
468 While in this study, we used measurements with the flow-centrifuge method as a reference,  
469 there are many indications that this method may be affected by measurement artefacts that arise  
470 during sample excision (Wheeler *et al.*, 2013) and preparation (Torres-Ruiz *et al.*, 2015) or as  
471 a result from vessel lengths exceeding the sample dimensions (Choat *et al.*, 2010; Martin-StPaul  
472 *et al.*, 2014; Torres-Ruiz *et al.*, 2014). A mismatch between curves obtained with the pneumatic  
473 method and the flow-centrifuge method may thus in part also be attributed to the imperfections  
474 of the latter. While there is hardly a way to overcome the limitation of imperfect reference  
475 values, we argue that methodological comparisons of VC methods may benefit from adopting

476 a more principled approach of quantifying the agreement between different methods in terms  
477 of different components of accuracy (cf. Fuchs *et al.*, 2017; Flo *et al.*, 2019). To our knowledge,  
478 none of the previously published methodological comparisons (see e.g. Li *et al.*, 2008; Choat  
479 *et al.*, 2010; Hacke *et al.*, 2015; Brodribb *et al.*, 2017; López *et al.*, 2019; Venturas *et al.*, 2019;  
480 Chen *et al.*, 2021; Pratt *et al.*, 2020; Sergent *et al.*, 2020; Zhao *et al.*, 2020) formally differentiate  
481 between systematic and random differences in parameter estimates, and none provide metrics  
482 that quantify the similarity over the entire curves. While our choice of the  $L_2$ -distance as a  
483 measure of overall agreement between curves is relatively arbitrary and there are many equally  
484 appropriate distance metrics, it is most definitely an improvement compared to the common  
485 practice of comparing methods by the Pearson correlation between parameter estimates, as the  
486 latter only penalizes deviations from a bivariate linear relationship while being insensitive to  
487 systematic deviations. We hope that our framework can serve as a starting point for more formal  
488 VC method comparisons based on rigorous metrological principles and theory.

489

#### 490 *Conclusions*

491 Our data indicate a high degree of agreement between the  $P_{50P}$  estimated with the pneumatic  
492 method and the  $P_{50H}$  estimated with the flow-centrifuge method for the analysed diffuse-porous  
493 temperate tree species, especially when using short air discharge times of around 15 sec. The  
494 relatively low effort required to construct a curve with this method and its high degree of  
495 automation when using a Pneumatron device in conjunction with a stem psychrometer allow  
496 for a high throughput. The method is therefore attractive in descriptive or predictive contexts  
497 where the main purpose is to generate a good proxy for plant drought resistance. However, the  
498 observed systematic deviation in slope estimates as well as potential artefacts associated with  
499 xylem water potential determination and species-specific drying behaviour deserve further  
500 attention.

501

502 **Acknowledgements**

503 We thank Klaus Körber and Andreas Lösch from the Bavarian state institute for viticulture and  
504 horticulture (Bayerische Landesanstalt für Wein- und Gartenbau, LWG) for granting access to  
505 their research facility at Stutel and Xinyi Guan for her support with the automated pneumatic  
506 measurements. P.R.L.B. acknowledges Royal Society's Newton International for its Fellowship  
507 (NF170370). S.J. acknowledges funding from the German Research Foundation (Deutsche  
508 Forschungsgemeinschaft, DFG, project nr. 410768178).

509

510 **Author contributions**

511 B.S. and R.M.L. designed the study, S.S.P. performed the semi-automated pneumatic  
512 measurements, technically supported by P.B. and L.P., L.P. the automated pneumatic  
513 measurements and E.I. the hydraulic measurements. S.S.P. and R.M.L. analysed the data. S.S.P,  
514 R.M.L. and B.S. wrote the first manuscript, which was intensively discussed and revised by all  
515 authors.

516 **References**

- 517 **Adams HD, Zeppel MJB, Anderegg WRL, Hartmann H, Landhäusser SM, Tissue DT, Huxman**  
518 **TE, Hudson PJ, Franz TE, Allen CD, et al. 2017.** A multi-species synthesis of physiological  
519 mechanisms in drought-induced tree mortality. *Nature Ecology & Evolution* **1**: 1285–1291.
- 520 **Allen CD, Breshears DD, McDowell NG. 2015.** On underestimation of global vulnerability to tree  
521 mortality and forest die-off from hotter drought in the Anthropocene. *Ecosphere* **6**: 1–55.
- 522 **Allen CD, Macalady AK, Chenchouni H, Bachelet D, McDowell N, Vennetier M, Kitzberger T,**  
523 **Rigling A, Breshears DD, Hogg EH (Ted), et al. 2010.** A global overview of drought and heat-  
524 induced tree mortality reveals emerging climate change risks for forests. *Forest Ecology and*  
525 *Management* **259**: 660–684.
- 526 **Anderegg WRL, Klein T, Bartlett M, Sack L, Pellegrini AFA, Choat B, Jansen S. 2016.** Meta-  
527 analysis reveals that hydraulic traits explain cross-species patterns of drought-induced tree  
528 mortality across the globe. *Proceedings of the National Academy of Sciences* **113**: 5024–5029.
- 529 **Bates D, Mächler M, Bolker B, Walker S. 2015.** Fitting linear mixed-effects models using lme4.  
530 *Journal of Statistical Software* **67**: 1–48.
- 531 **Bittencourt PRL, Pereira L, Oliveira RS. 2018.** Pneumatic Method to Measure Plant Xylem  
532 Embolism. *Bio-Protocol* **8**.
- 533 **Blackman CJ, Gleason SM, Chang Y, Cook AM, Laws C, Westoby M. 2014.** Leaf hydraulic  
534 vulnerability to drought is linked to site water availability across a broad range of species and  
535 climates. *Annals of Botany* **114**: 435–440.
- 536 **Brando PM, Paolucci L, Ummenhofer CC, Ordway EM, Hartmann H, Cattau ME, Rattis L,**  
537 **Medjibe V, Coe MT, Balch J. 2019.** Droughts, Wildfires, and Forest Carbon Cycling: A  
538 Pantropical Synthesis. *Annual Review of Earth and Planetary Sciences* **47**: 555–581.
- 539 **Brodersen CR, McElrone AJ, Choat B, Matthews MA, Shackel KA. 2010.** The Dynamics of  
540 Embolism Repair in Xylem: In Vivo Visualizations Using High-Resolution Computed  
541 Tomography. *Plant Physiology* **154**: 1088–1095.
- 542 **Brodrribb TJ, Cochard H. 2009.** Hydraulic Failure Defines the Recovery and Point of Death in Water-  
543 Stressed Conifers. *Plant Physiology* **149**: 575–584.
- 544 **Brodrribb TJ, Skelton RP, McAdam SA, Bienaimé D, Lucani CJ, Marmottant P. 2016.** Visual  
545 quantification of embolism reveals leaf vulnerability to hydraulic failure. *New Phytologist* **209**:  
546 1403–1409.
- 547 **Brodrribb TJ, Carriqui M, Delzon S, Lucani C. 2017.** Optical Measurement of Stem Xylem  
548 Vulnerability. *Plant Physiology* **174**: 2054–2061.

- 549 **Brodribb TJ, Powers J, Cochard H, Choat B. 2020.** Hanging by a thread? Forests and drought.  
550 *Science* **368**: 261–266. **Chen Y, Maenpuen P, Zhang Y, Barai K, Katabuchi M, Gao H,**  
551 **Kaewkamol S, Tao L, Zhang J. 2020.** Quantifying vulnerability to embolism in tropical trees  
552 and lianas using five methods: can discrepancies be explained by xylem structural traits? *New*  
553 *Phytologist* **229**: 805–819.
- 554 **Chen Y, Maenpuen P, Zhang Y, Barai K, Katabuchi M, Gao H, Kaewkamol S, Tao L, Zhang J.**  
555 **2021.** Quantifying vulnerability to embolism in tropical trees and lianas using five methods: can  
556 discrepancies be explained by xylem structural traits? *New Phytologist* **229**: 805–819.
- 557 **Choat B, Drayton WM, Brodersen C, Matthews MA, Shackel KA, Wada H, Mcelrone AJ. 2010.**  
558 Measurement of vulnerability to water stress-induced cavitation in grapevine: a comparison of  
559 four techniques applied to a long-vesseled species: Comparison of vulnerability curve technique  
560 in grapevine. *Plant, Cell & Environment* **491**: 752-755.
- 561 **Choat B, Jansen S, Brodribb TJ, Cochard H, Delzon S, Bhaskar R, Bucci SJ, Feild TS, Gleason**  
562 **SM, Hacke UG et al. 2012.** Global convergence in the vulnerability of forests to drought. *Nature*  
563 **491**: 752–755.
- 564 **Choat B, Brodribb TJ, Brodersen CR, Duursma RA, López R, Medlyn BE. 2018.** Triggers of tree  
565 mortality under drought. *Nature* **558**: 531–539.
- 566 **Christoffersen BO, Gloor M, Fauset S, Fyllas NM, Galbraith DR, Baker R, Kruijt B, Rowland L,**  
567 **Fisher RA, Binks OJ et al. 2016.** Linking hydraulic traits to tropical forest function in a size-  
568 structured and trait-driven model (TFS v.1-Hydro). *Geoscientific Model Development* **9**: 4227–  
569 4255.
- 570 **Cochard H, Cruziat P, Tyree MT. 1992.** Use of Positive Pressures to Establish Vulnerability Curves.  
571 *Plant Physiology* **100**: 205–209.
- 572 **Cochard H, Damour G, Bodet C, Tharwat I, Poirier M, Améglio T. 2005.** Evaluation of a new  
573 centrifuge technique for rapid generation of xylem vulnerability curves. *Physiologia Plantarum*  
574 **124**: 410–418.
- 575 **Cochard H, Badel E, Herbette S, Delzon S, Choat B, Jansen S. 2013.** Methods for measuring plant  
576 vulnerability to cavitation: a critical review. *Journal of Experimental Botany* **64**: 4779–4791.
- 577 **Correia DLP, Bouchard M, Filotas É, Raulier F. 2019.** Disentangling the effect of drought on stand  
578 mortality and productivity in northern temperate and boreal forests. *Journal of Applied Ecology*  
579 **56**: 758–768.
- 580 **Cramér H. 1928.** On the composition of elementary errors. II Statistical applications. *Skandinavisk*  
581 *Aktuarietidskrift* **11**: 141–180.



- 582 **Davi H, Cailleret M. 2017.** Assessing drought-driven mortality trees with physiological process-based  
583 models. *Agricultural and Forest Meteorology* **232**: 279–290.
- 584 **Delzon S, Cochard H. 2014.** Recent advances in tree hydraulics highlight the ecological significance  
585 of the hydraulic safety margin. *New Phytologist* **203**: 355–358.
- 586 **Duursma RA, Choat B. 2017.** fitple : an R package to fit hydraulic vulnerability curves. *Journal of*  
587 *Plant Hydraulics* **4**: e002.
- 588 **Eller CB, Rowland L, Mencuccini M, Rosas T, Williams K, Harper A, Medlyn BE, Wagner Y,**  
589 **Klein T, Teodoro GS, et al. 2020.** Stomatal optimization based on xylem hydraulics (SOX)  
590 improves land surface model simulation of vegetation responses to climate. *New Phytologist* **226**:  
591 1622–1637.
- 592 **Field CB, Barros V, Stocker TF, Dahe Q (Eds.). 2012.** Managing the Risks of Extreme Events and  
593 Disasters to Advance Climate Change Adaptation: Special Report of the Intergovernmental Panel  
594 on Climate Change. Cambridge: *Cambridge University Press*.
- 595 **Flo V, Martinez-Vilalta J, Steppe K, Schuldt B, Poyatos R. 2019.** A synthesis of bias and uncertainty  
596 in sap flow methods. *Agricultural and Forest Meteorology* **271**: 362–374.
- 597 **Franz G, Kram G. 1985.** Structural investigations on the watersoluble polysaccharides of lime tree  
598 flowers. *Die Pharmazie* **41**: 501.
- 599 **Fuchs S, Leuschner C, Link R, Coners H, Schuldt B. 2017.** Calibration and comparison of thermal  
600 dissipation, heat ratio and heat field deformation sap flow probes for diffuse-porous trees.  
601 *Agricultural and Forest Meteorology* **244–245**: 151–161.
- 602 **Galiano L, Timofeeva G, Saurer M, Siegwolf R, Martínez-Vilalta J, Hommel R, Gessler A. 2017.**  
603 The fate of recently fixed carbon after drought release: towards unravelling C storage regulation  
604 in *Tilia platyphyllos* and *Pinus sylvestris*. *Plant, Cell & Environment* **40**: 1711–1724.
- 605 **Guan X., Pereira L., McAdam S.A.M., Cao K., Jansen S. 2021.** No gas source, no problem: proximity  
606 to pre-existing embolism and segmentation affect embolism spreading in angiosperm xylem by  
607 gas diffusion. *Plant, Cell & Environment*. doi: 10.1111/pce.14016.
- 608 **Hacke UG, Venturas MD, MacKinnon ED, Jacobsen AL, Sperry JS, Pratt RB. 2015.** The standard  
609 centrifuge method accurately measures vulnerability curves of long-vesselled olive stems. *New*  
610 *Phytologist* **205**: 116–127.
- 611 **Hartmann H, Link RM, Schuldt B. 2021.** A whole-plant perspective of isohydry: stem-level support  
612 for leaf-level plant water regulation. *Tree Physiology*, accepted.
- 613 **Hochberg U, Windt CW, Ponomarenko A, Zhang Y-J, Gersony J, Rockwell FE, Holbrook NM.**  
614 **2017.** Stomatal Closure, Basal Leaf Embolism, and Shedding Protect the Hydraulic Integrity of  
615 Grape Stems. *Plant Physiology* **174**: 764–775.

- 616 **Jansen S, Schuldt B, Choat B. 2015.** Current controversies and challenges in applying plant hydraulic  
617 techniques. *New Phytologist* **205**: 961–964.
- 618 **Jansen S, Guan X, Kaack L, Trabi C, Miranda M, Ribeiro R, Pereira L. 2020.** The Pneumatron  
619 estimates xylem embolism resistance in angiosperms based on gas diffusion kinetics: a mini-  
620 review. *Acta Horticulturae* **1300**: 193–200.
- 621 **Kiorapostolou N, Galiano-Pérez L, von Arx G, Gessler A, Petit G. 2018.** Structural and anatomical  
622 responses of *Pinus sylvestris* and *Tilia platyphyllos* seedlings exposed to water shortage. *Trees*  
623 **32**: 1211–1218.
- 624 **Klepsch M, Zhang Y, Kotowska MM, Lamarque LJ, Nolf M, Schuldt B, Torres-Ruiz JM, Qin D-  
625 W, Choat B, Delzon S, et al. 2018.** Is xylem of angiosperm leaves less resistant to embolism than  
626 branches? Insights from microCT, hydraulics, and anatomy. *Journal of Experimental Botany* **69**:  
627 5611–5623.
- 628 **Kuznetsova A, Brockhoff PB, Christensen RHB. 2017.** lmerTest Package: Tests in Linear Mixed  
629 Effects Models. *Journal of Statistical Software* **82**: 1–26.
- 630 **Leuschner C, Wedde P, Lübke T. 2019.** The relation between pressure–volume curve traits and  
631 stomatal regulation of water potential in five temperate broadleaf tree species. *Annals of Forest  
632 Science* **76**: 60.
- 633 **Leuzinger S, Zotz G, Asshoff R, Korner C. 2005.** Responses of deciduous forest trees to severe  
634 drought in Central Europe. *Tree Physiology* **25**: 641–650.
- 635 **Li Y, Sperry JS, Taneda H, Bush SE, Hacke UG. 2008.** Evaluation of centrifugal methods for  
636 measuring xylem cavitation in conifers, diffuse- and ring-porous angiosperms. *New Phytologist*  
637 **177**: 558–568.
- 638 **López R, Nolf M, Duursma RA, Badel E, Flavel RJ, Cochard H, Choat B. 2019.** Mitigating the open  
639 vessel artefact in centrifuge-based measurement of embolism resistance (R Tognetti, Ed.). *Tree  
640 Physiology* **39**: 143–155.
- 641 **Martin-StPaul NK, Longepierre D, Huc R, Delzon S, Burlett R, Joffre R, Rambal S, Cochard H.  
642 2014.** How reliable are methods to assess xylem vulnerability to cavitation? The issue of ‘open  
643 vessel’ artifact in oaks. *Tree Physiology* **34**: 894–905.
- 644 **Martin-StPaul N, Delzon S, Cochard H. 2017.** Plant resistance to drought depends on timely stomatal  
645 closure. *Ecology Letters* **20**: 1437–1447.
- 646 **McDowell NG, Fisher RA, Xu C, Domec JC, Hölttä T, Mackay DS, Sperry JS, Boutz A, Dickman  
647 L, Gehres N et al. 2013a.** Evaluating theories of drought-induced vegetation mortality using a  
648 multimodel-experiment framework. *New Phytologist* **200**: 304–321.

- 649 **McDowell NG, Ryan MG, Zeppel MJB, Tissue DT. 2013b.** Feature: Improving our knowledge of  
650 drought-induced forest mortality through experiments, observations, and modeling. *New*  
651 *Phytologist* **200**: 289–293.
- 652 **Meinzer FC, Johnson DM, Lachenbruch B, McCulloh KA, Woodruff DR. 2009.** Xylem hydraulic  
653 safety margins in woody plants: coordination of stomatal control of xylem tension with hydraulic  
654 capacitance. *Functional Ecology* **23**: 922–930.
- 655 **Niinemets Ü, Sõber A, Kull O, Hartung W, Tenhunen JD. 1999.** Apparent Controls on Leaf  
656 Conductance by Soil Water Availability and via Light-Acclimation of Foliage Structural and  
657 Physiological Properties in a Mixed Deciduous, Temperate Forest. *International Journal of Plant*  
658 *Sciences* **160**: 707–721.
- 659 **Nolf M, López R, Peters J, Flavel R, Koloadin L, Young I, Choat B. 2017.** Visualization of xylem  
660 embolism by X-ray microtomography: A direct test against hydraulic measurements. *New*  
661 *Phytologist* **214**: 890–898.
- 662 **Ogle K, Barber JJ, Willson C, Thompson B. 2009.** Hierarchical statistical modeling of xylem  
663 vulnerability to cavitation. *New Phytologist* **182**: 541–554.
- 664 **Oliveira RS, Costa FRC, Baalen E van, Jonge A de, Bittencourt PR, Almanza Y, Barros F de V,**  
665 **Cordoba EC, Fagundes MV, Garcia S et al. 2019.** Embolism resistance drives the distribution  
666 of Amazonian rainforest tree species along hydro-topographic gradients. *New Phytologist* **221**:  
667 1457–1465.
- 668 **Pammenter NW, Vander Willigen C. 1998.** A mathematical and statistical analysis of the curves  
669 illustrating vulnerability of xylem to cavitation. *Tree Physiology* **18**: 589–593.
- 670 **Pereira L, Bittencourt PRL, Oliveira RS, Junior MBM, Barros FV, Ribeiro RV, Mazzafera P.**  
671 **2016.** Plant pneumatics: stem air flow is related to embolism - new perspectives on methods in  
672 plant hydraulics. *New Phytologist* **211**: 357–370.
- 673 **Pereira L, Bittencourt PRL, Pacheco VS, Miranda MT, Zhang Y, Oliveira RS, Groenendijk P,**  
674 **Machado EC, Tyree MT, Jansen S et al. 2020.** The Pneumatron: An automated pneumatic  
675 apparatus for estimating xylem vulnerability to embolism at high temporal resolution. *Plant, Cell*  
676 *& Environment* **43**: 131–142.
- 677 **Pigott D. 2012.** Lime-trees and Basswoods: A Biological Monograph of the Genus *Tilia*. *Cambridge*  
678 *University Press*.
- 679 **Pivovarov AL, Burlett R, Lavigne B, Cochard H, Santiago LS, Delzon S. 2016.** Testing the  
680 ‘microbubble effect’ using the Cavatron technique to measure xylem water extraction curves. *AoB*  
681 *Plants* **8**.

- 682 **Powers JS, Vargas-G G, Brodribb TJ, Schwartz NB, Perez-Aviles D, Smith-Martin CM, Becknell**  
683 **JM, Aureli F, Blanco R, Calderón-Morales E *et al.* 2020.** A catastrophic tropical drought kills  
684 hydraulically vulnerable tree species. *Global Change Biology* **26**: 3122–3133.
- 685 **Pratt RB, Castro V, Fickle JC, Jacobsen AL. 2020.** Embolism resistance of different aged stems of a  
686 California oak species (*Quercus douglasii*): optical and microCT methods differ from the  
687 benchtop-dehydration standard (M Ball, Ed.). *Tree Physiology* **40**: 5–18.
- 688 **Pyra N. 2020.** scam: Shape Constrained Additive Models. R package version 1.2-8. URL:  
689 <https://CRAN.R-project.org/package=scam>
- 690 **R Core Team. 2020.** R: A language and environment for statistical computing. Vienna, Austria.
- 691 **Rosenberg MS, Koricheva J, Gurevitch J, Mengersen K. 2013.** Moment and least-squares based  
692 approaches to meta-analytic inference. In: Handbook of meta-analysis in ecology and evolution.  
693 Princeton and Oxford: *Princeton University Press*, 108–124.
- 694 **Rosner S, Heinze B, Savi T, Dalla-Salda G. 2019.** Prediction of hydraulic conductivity loss from  
695 relative water loss: new insights into water storage of tree stems and branches. *Physiologia*  
696 *Plantarum* **165**: 843–854.
- 697 **Sergent AS, Varela SA, Barigah TS, Badel E, Cochard H, Dalla-Salda G, Delzon S, Fernández**  
698 **ME, Guillemot J, Gyenge J *et al.* 2020.** A comparison of five methods to assess embolism  
699 resistance in trees. *Forest Ecology and Management* **468**: 118175.
- 700 **Sperry JS, Donnelly JR, Tyree MT. 1988.** A method for measuring hydraulic conductivity and  
701 embolism in xylem. *Plant, Cell & Environment* **11**: 35–40.
- 702 **Sperry JS, Tyree MT. 1988.** Mechanism of Water Stress-Induced Xylem Embolism. *Plant Physiology*  
703 **88**: 581–587.
- 704 **Sperry JS, Hacke UG, Wheeler JK. 2005.** Comparative analysis of end wall resistivity in xylem  
705 conduits. *Plant, Cell & Environment* **28**: 456–465.
- 706 **Torres-Ruiz JM, Cochard H, Mayr S, Beikircher B, Diaz-Espejo A, Rodriguez-Dominguez CM,**  
707 **Badel E, Fernández JE. 2014.** Vulnerability to cavitation in *Olea europaea* current-year shoots:  
708 further evidence of an open-vessel artifact associated with centrifuge and air-injection techniques.  
709 *Physiologia Plantarum* **152**: 465–474.
- 710 **Torres-Ruiz JM, Jansen S, Choat B, McElrone AJ, Cochard H, Brodribb TJ, Badel E, Burlett R,**  
711 **Bouche PS, Brodersen CR *et al.* 2015.** Direct X-Ray Microtomography Observation Confirms  
712 the Induction of Embolism upon Xylem Cutting under Tension. *Plant Physiology* **167**: 40–43.
- 713 **Trenberth KE, Dai A, van der Schrier G, Jones PD, Barichivich J, Briffa KR, Sheffield J. 2014.**  
714 Global warming and changes in drought. *Nature Climate Change* **4**: 17–22.

- 715 **Trueba S, Pouteau R, Lens F, Feild TS, Isnard S, Olson ME, Delzon S. 2017.** Vulnerability to xylem  
716 embolism as a major correlate of the environmental distribution of rain forest species on a tropical  
717 island. *Plant, Cell & Environment* **40**: 277–289.
- 718 **Urli M, Porte AJ, Cochard H, Guengant Y, Burlett R, Delzon S. 2013.** Xylem embolism threshold  
719 for catastrophic hydraulic failure in angiosperm trees. *Tree Physiology* **33**: 672–683.
- 720 **Venturas MD, Pratt RB, Jacobsen AL, Castro V, Fickle JC, Hacke UG. 2019.** Direct comparison  
721 of four methods to construct xylem vulnerability curves: Differences among techniques are linked  
722 to vessel network characteristics. *Plant, Cell & Environment* **42**: 2422–2436.
- 723 **Wheeler JK, Huggett BA, Tofte AN, Rockwell FE, Holbrook NM. 2013.** Cutting xylem under tension  
724 or supersaturated with gas can generate PLC and the appearance of rapid recovery from  
725 embolism: Sampling induced embolism. *Plant, Cell & Environment* **36**: 1938–1949.
- 726 **Wheeler JK, Sperry JS, Hacke UG, Hoang N. 2005.** Inter-vessel pitting and cavitation in woody  
727 Rosaceae and other vesselled plants: a basis for a safety versus efficiency trade-off in xylem  
728 transport. *Plant, Cell & Environment* **28**: 800–812.
- 729 **Wickham H, Averick M, Bryan J, Chang W, McGowan LD, François R, Grolemund G, Hayes A,  
730 Henry L, Hester J, et al. 2019.** Welcome to the Tidyverse. *Journal of Open Source Software* **4**:  
731 1686.
- 732 **Wolfe BT, Sperry JS, Kursar TA. 2016.** Does leaf shedding protect stems from cavitation during  
733 seasonal droughts? A test of the hydraulic fuse hypothesis. *New Phytologist* **212**: 1007–1018.
- 734 **Wu M, Zhang Y, Oya T, Marcati CR, Pereira L, Jansen S. 2020.** Root xylem in three woody  
735 angiosperm species is not more vulnerable to embolism than stem xylem. *Plant and Soil* **450**:  
736 479–495.
- 737 **Xu X, Medvigy D, Powers JS, Becknell JM, Guan K. 2016.** Diversity in plant hydraulic traits explains  
738 seasonal and inter-annual variations of vegetation dynamics in seasonally dry tropical forests.  
739 *New Phytologist* **212**: 80–95.
- 740 **Yang D., Pereira P., Peng G., Ribeiro R.V., Kaack L., Jansen S., Tyree M.T. Submitted.**  
741 A Unit Pipe Pneumatic model to simulate gas kinetics during measurements of embolism  
742 in excised angiosperm xylem. bioRxiv, <https://doi.org/10.1101/2021.02.09.430450>.
- 743 **Zhang Y, Lamarque LJ, Torres-Ruiz JM, Schuldt B, Karimi Z, Li S, Qin D-W, Bittencourt P,  
744 Burlett R, Cao K-F, et al. 2018.** Testing the plant pneumatic method to estimate xylem embolism  
745 resistance in stems of temperate trees. *Tree Physiology* **38**: 1016–1025.
- 746 **Zhao H, Jiang Z, Ma J, Cai J. 2020.** What causes the differences in cavitation resistance of two shrubs?  
747 Wood anatomical explanations and reliability testing of vulnerability curves. *Physiologia*  
748 *Plantarum* **169**: 156–168.

749 **Zhu S-D, Liu H, Xu Q-Y, Cao K-F, Ye Q. 2016.** Are leaves more vulnerable to cavitation than  
750 branches? *Functional Ecology* **30**: 1740–1744.

751 **Zimmermann U, Wagner H-J, Heidecker M, Mimietz S, Schneider H, Szimtenings M, Haase A,**  
752 **Mitlöhner R, Kruck W, Hoffmann R, et al. 2002.** Implications of mucilage on pressure bomb  
753 measurements and water lifting in trees rooting in high-salinity water. *Trees* **16**: 100–111.

## Tables

**Table 1:** List of the 12 diffuse-porous tree species used in the present study, average midday leaf water potential ( $\Psi_{\text{midday}}$ ) measured in August 2020 and the average diameter at breast height (DBH) of the selected trees per species (mean  $\pm$  SE);  $n_P$  and  $n_H$  indicate the number of xylem vulnerability curves measured for the pneumatic and the flow-centrifuge method, respectively (values in brackets indicate when branch samples were collected from a single tree). Asterisks (\*) indicate xylem pressures measured with stem psychrometers; hashes (#) indicate individuals from the same species measured with the pressure bomb.

| Species                      | Family      | $n_P$ | $n_H$ | $\Psi_{\text{midday}}$ (MPa) | DBH (cm)         |
|------------------------------|-------------|-------|-------|------------------------------|------------------|
| <i>Betula pendula</i>        | Betulaceae  | 3     | 3     | -1.60 $\pm$ 0.04             | 10.93 $\pm$ 0.64 |
| <i>Betula utilis</i>         | Betulaceae  | 3     | 3     | -1.54 $\pm$ 0.06             | 08.88 $\pm$ 0.42 |
| <i>Carpinus betulus</i>      | Betulaceae  | 3     | 3     | -2.47 $\pm$ 0.06             | 10.75 $\pm$ 0.44 |
| <i>Crataegus persimilis</i>  | Rosaceae    | 3     | 3     | -3.42 $\pm$ 0.18             | 07.55 $\pm$ 0.16 |
| <i>Ostrya carpinifolia</i>   | Betulaceae  | 3     | 3     | -2.97 $\pm$ 0.11             | 09.18 $\pm$ 0.11 |
| <i>Platanus x acerifolia</i> | Platanaceae | 3     | 3     | -1.74 $\pm$ 0.03             | 10.00 $\pm$ 0.24 |
| <i>Platanus orientalis</i>   | Platanaceae | 3     | 3     | -1.51 $\pm$ 0.04             | 12.07 $\pm$ 0.35 |
| <i>Pyrus calleryana</i>      | Rosaceae    | 2     | 3     | -3.52 $\pm$ 0.30             | 11.88 $\pm$ 0.32 |
| <i>Sorbus latifolia</i>      | Rosaceae    | 3     | 3     | -3.64 $\pm$ 0.19             | 09.30 $\pm$ 0.39 |
| <i>Tilia cordata</i> *       | Malvaceae   | 5(1)  | 5(1)  | NA                           | 28.00 $\pm$ 0.00 |
| <i>Tilia cordata</i> #       | Malvaceae   | 3     | 3     | -1.90 $\pm$ 0.04             | 11.40 $\pm$ 0.46 |
| <i>Tilia japonica</i>        | Malvaceae   | 3(1)  | 4(1)  | NA                           | 30.40 $\pm$ 0.00 |
| <i>Tilia platyphyllos</i> *  | Malvaceae   | 4(1)  | 7(1)  | NA                           | 70.00 $\pm$ 0.21 |
| <i>Tilia platyphyllos</i> #  | Malvaceae   | 3     | 3     | -1.80 $\pm$ 0.08             | 12.38 $\pm$ 0.21 |

**Table 2:** Parameter estimates of the linear mixed effect models for the xylem water potential at 12%, 50% and 88% loss of conductivity ( $P_{12}$ ,  $P_{50}$  and  $P_{88}$ , respectively) and the natural log-transformed slope at 50% loss of conductivity ( $S_{50}$ ). Given are estimates for the intercept (average for flow-centrifuge based reference value) as well as the differences from the reference for different AD times, with the corresponding standard errors,  $t$ -statistics, approximate degrees of freedom based on the Satterthwaite approximation and corresponding  $P$ -values.

| Parameter | Treatment   | Estimate | Std.error | $t$ -statistic | edf    | $P$ -value |
|-----------|-------------|----------|-----------|----------------|--------|------------|
| $P_{12}$  | (Intercept) | -2.814   | 0.32      | -8.79          | 12.085 | < 0.001    |
|           | Δ 15 s      | 0.444    | 0.086     | 5.144          | 198.53 | < 0.001    |
|           | Δ 30 s      | 0.532    | 0.086     | 6.163          | 198.53 | < 0.001    |
|           | Δ 60 s      | 0.631    | 0.086     | 7.311          | 198.53 | < 0.001    |
|           | Δ 90 s      | 0.702    | 0.086     | 8.13           | 198.53 | < 0.001    |
|           | Δ 115 s     | 0.758    | 0.086     | 8.781          | 198.53 | < 0.001    |
| $P_{50}$  | (Intercept) | -3.652   | 0.495     | -7.383         | 11.154 | < 0.001    |
|           | Δ 15 s      | 0.114    | 0.056     | 2.037          | 202.67 | 0.043      |
|           | Δ 30 s      | 0.184    | 0.056     | 3.284          | 202.67 | 0.001      |
|           | Δ 60 s      | 0.259    | 0.056     | 4.632          | 202.67 | < 0.001    |
|           | Δ 90 s      | 0.305    | 0.056     | 5.453          | 202.67 | < 0.001    |
|           | Δ 115 s     | 0.332    | 0.056     | 5.936          | 202.67 | < 0.001    |
| $P_{88}$  | (Intercept) | -4.512   | 0.699     | -6.451         | 11.263 | < 0.001    |
|           | Δ 15 s      | -0.213   | 0.094     | -2.265         | 200.67 | 0.025      |
|           | Δ 30 s      | -0.162   | 0.094     | -1.718         | 200.67 | 0.087      |
|           | Δ 60 s      | -0.11    | 0.094     | -1.169         | 200.67 | 0.244      |
|           | Δ 90 s      | -0.089   | 0.094     | -0.945         | 200.67 | 0.346      |
|           | Δ 115 s     | -0.091   | 0.094     | -0.968         | 200.67 | 0.334      |
| $S_{50}$  | (Intercept) | 4.258    | 0.2       | 21.30          | 12.452 | < 0.001    |
|           | Δ 15 s      | -0.253   | 0.081     | -3.124         | 204.53 | 0.002      |
|           | Δ 30 s      | -0.266   | 0.081     | -3.284         | 204.53 | 0.001      |
|           | Δ 60 s      | -0.287   | 0.081     | -3.536         | 204.53 | < 0.001    |
|           | Δ 90 s      | -0.303   | 0.081     | -3.742         | 204.53 | < 0.001    |
|           | Δ 115 s     | -0.326   | 0.081     | -4.022         | 204.53 | < 0.001    |



## Figure captions

**Figure 1:** Xylem vulnerability curves obtained with the pneumatic method after a measurement duration of 15 sec (green) and the flow-centrifuge method (blue) for 12 diffuse-porous tree species. Circles: observed values (for the centrifuge data, rescaled from conductance to PLC using the estimated  $k_{\text{sat}}$ ); solid lines: predicted PLC/PAD; dashed lines: estimated  $P_{50}$ . Asterisks (\*) at the end of species names indicate xylem pressure measurements with stem psychrometers.

**Figure 2:** Relationship between estimates from the flow-centrifuge method (x-axis) and the pneumatic method with 15 sec air discharge interval (y-axis). a)  $P_{12}$ , b)  $P_{50}$ , c)  $P_{88}$  (xylem water potentials at 12%, 50% and 88%, respectively) and d) slope at 50% loss of conductivity (displayed on a log scale). Colours – species identity (empty circles indicate pressure chamber-based *Tilia* measurements); solid black line – standardized major axis (SMA) regression fit through all points  $\pm$  95% bootstrap confidence interval; grey dashed line: 1:1 line.

**Figure 3:** Comparison of  $P_{50}$  values between the flow-centrifuge and different air discharge intervals for the pneumatic method (compared on the same branch). C indicates the  $P_{50}$  values from the flow-centrifuge method, 15, 30, 60, 90, and 115 indicate AD measurement intervals (in seconds) evaluated from the pneumatic method. Shown are the raw estimates overlaid with their mean  $\pm$  SE. Asterisks (\*) at the end of species name indicate xylem pressure was determined using stem psychrometer.

**Figure 4:** Statistics describing the agreement between the estimated vulnerability curve parameters from the pneumatic method and the flow-centrifuge method vs. the duration of air

discharge measurement (estimates  $\pm 95\%$  bootstrap confidence intervals based on 1,000 bootstrap draws). The metrics shown are the Pearson correlation (Pearson  $\rho$ ) as a measure of random deviation between the two methods (values close to one indicate a perfect linear relationship), mean signed deviation (MSD) as a measure of systematic deviations (values close to zero indicate a low bias), and root mean square deviation (RMSD) as a measure of overall agreement (low values indicate a high agreement between methods).

**Figure 5:** Average  $L_2$  distance between the pneumatic and flow-centrifuge vulnerability curves vs. air discharge time as a measure of overall accuracy (raw averages and  $\pm 5$  s running average). Vertical lines indicate the minimum of the running average at 16 sec; the shaded area indicates the range with a running average differing from the minimum by less than 1% (10.5 – 44.5 sec).

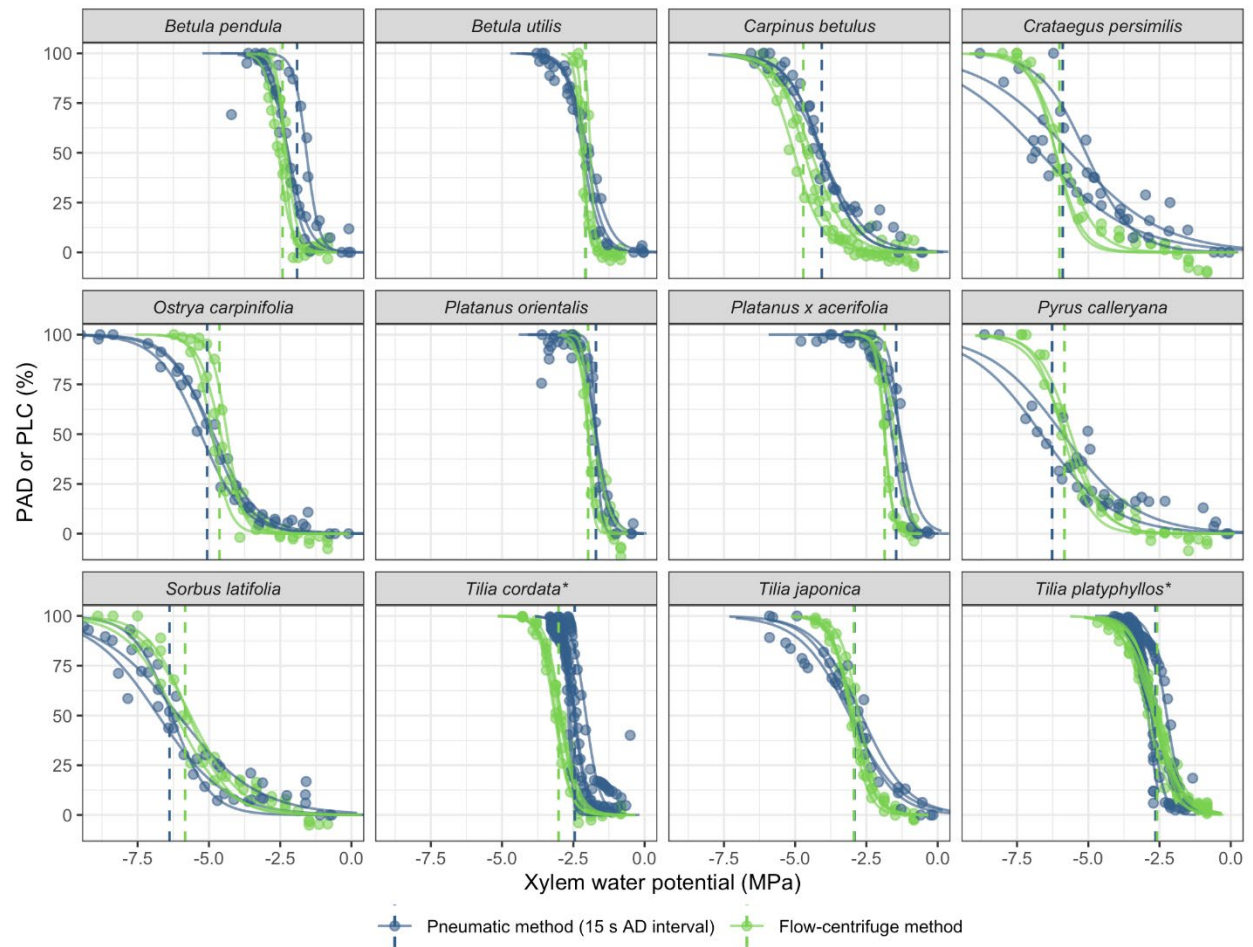

Figure 1

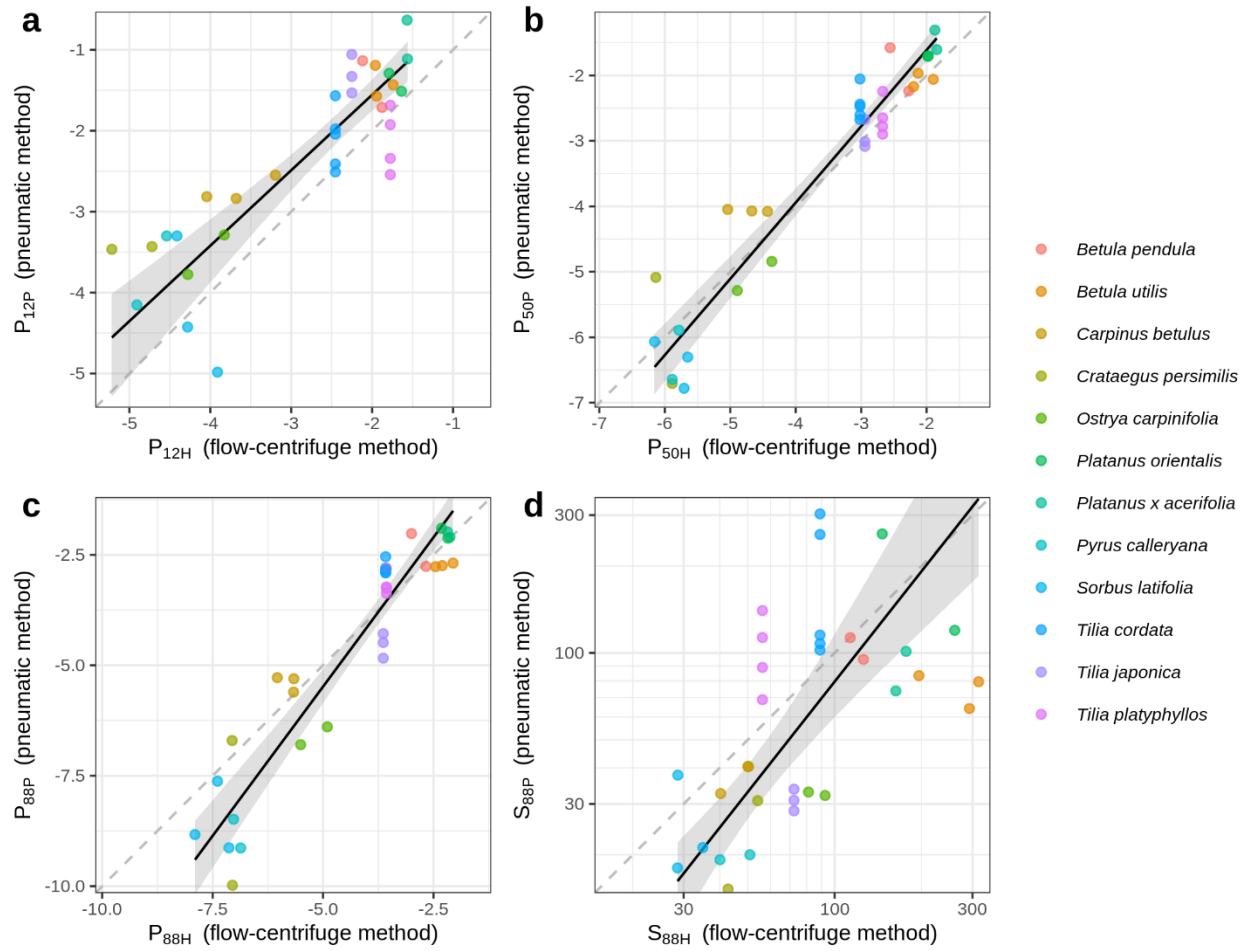

Figure 2

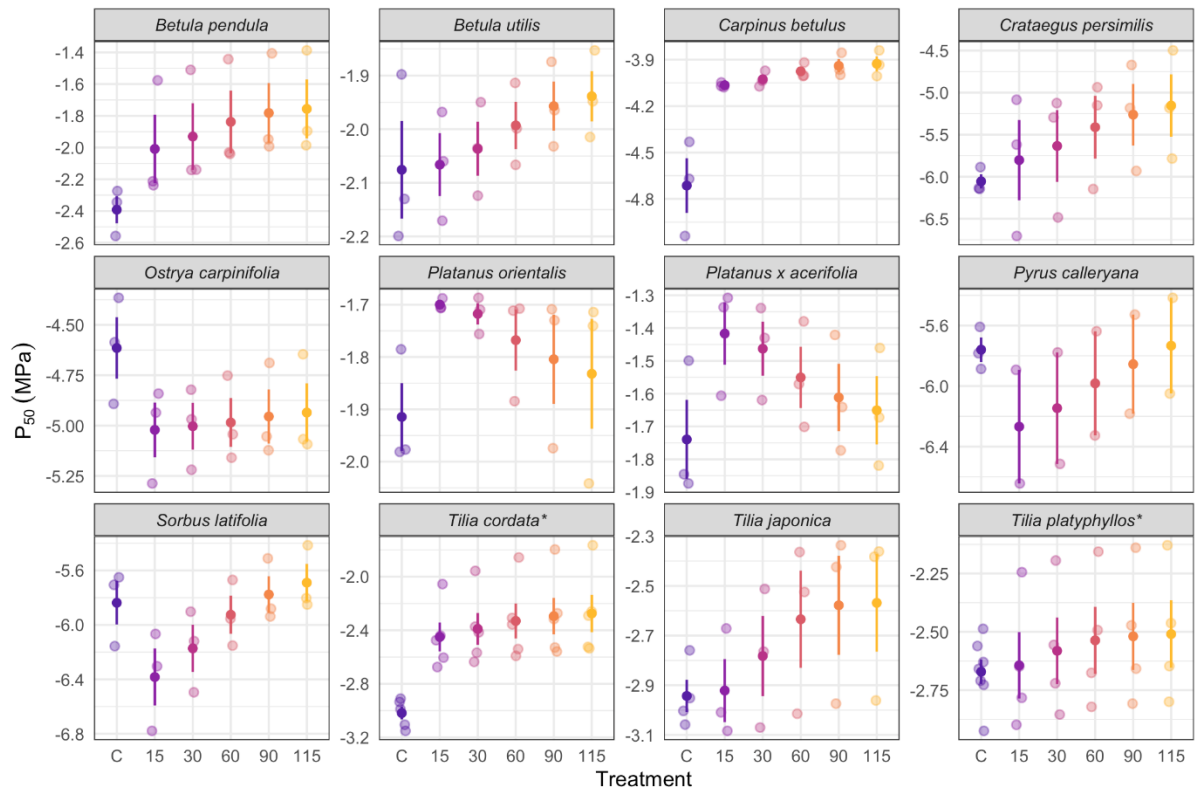

Figure 3

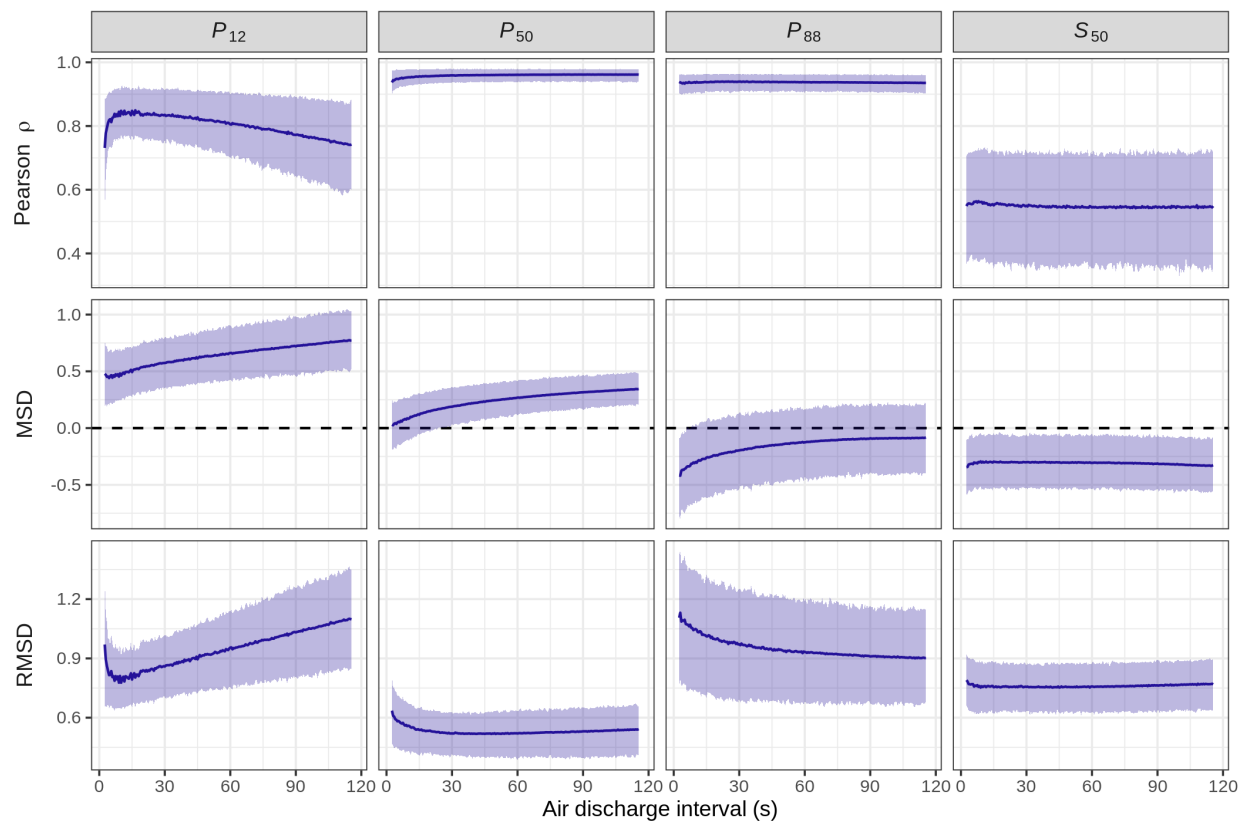

Figure 4

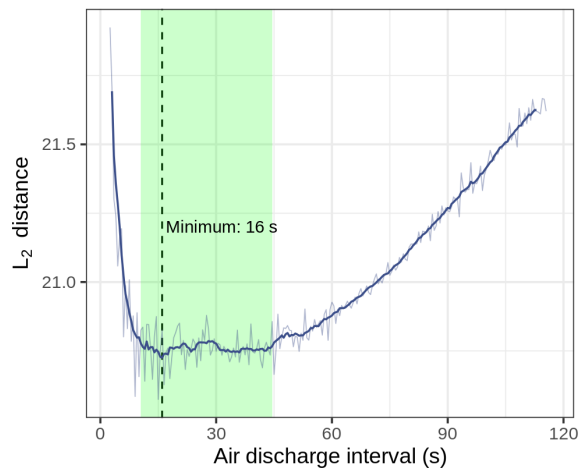

Figure 5
